# Supplementary material
Source: HighWire-hosted journal article supplement (https://jnm.snmjournals.org/highwire/filestream/95293/field_highwire_adjunct_files/0/199752_Supplemental_Data.pdf)
Supplement: 199752_Supplemental_Data.pdf [file 199752_Supplemental_Data.pdf]

## Supplemental Table 1: Survival analysis based on AFP trends.

| Landmark                                       | Response                                     | N (%)     | median OS (95%CI) | P                 |
|------------------------------------------------|----------------------------------------------|-----------|-------------------|-------------------|
| <b>Baseline (n=185)</b>                        | <100                                         | 123 (66%) | 11.4 (7.9-13.9)   | 0.05              |
|                                                | ≥100                                         | 62 (34%)  | 6.5 (5-7.7)       |                   |
| <b>AFP follow-up at any time point (n=101)</b> | Responders (AFP<13 ng/dL)                    | 12 (12%)  | 23.9 (20-124)     | <b>&lt;0.0001</b> |
|                                                | Non / partial responders                     | 89 (88%)  | 6.5 (4.8-7.8)     |                   |
| <b>1-month (n=101)</b>                         | Responders (≥50% decrease from baseline)     | 49 (48%)  | 8.5 (6.5-14.3)    | <b>0.018</b>      |
|                                                | Non-responders (<50% decrease from baseline) | 52 (52%)  | 4.8 (3.7-7.7)     |                   |
| <b>3-month (n=65)</b>                          | Responders (≥50% decrease from baseline)     | 43 (66%)  | 13.3 (8.7-17.7)   | <b>0.021</b>      |
|                                                | Non-responders (<50% decrease from baseline) | 22 (34%)  | (5.3-8.9)         |                   |

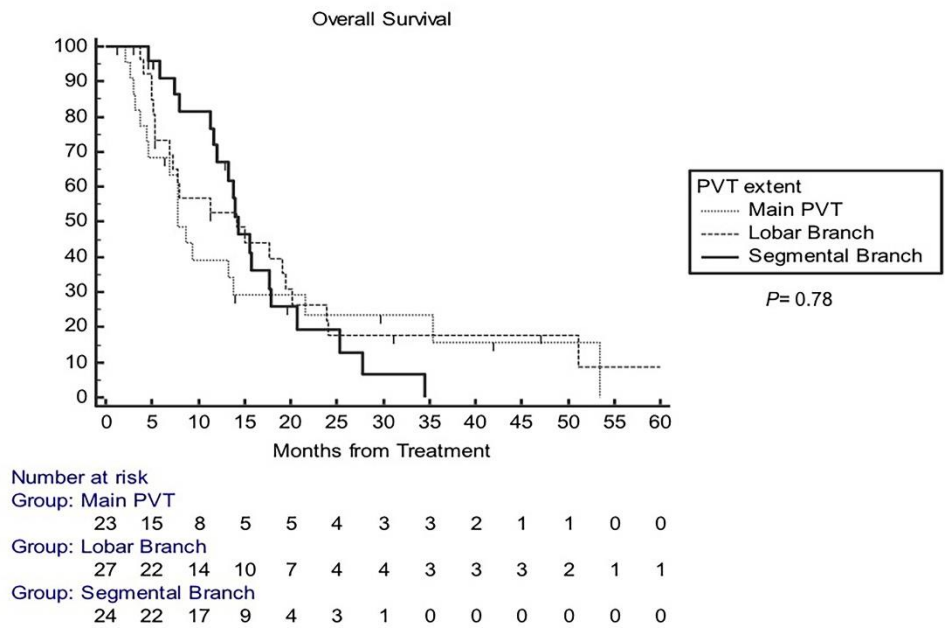

Supplemental Figure 1A: Overall Survival: CP A Main vs. Lobar Vs. Segmental

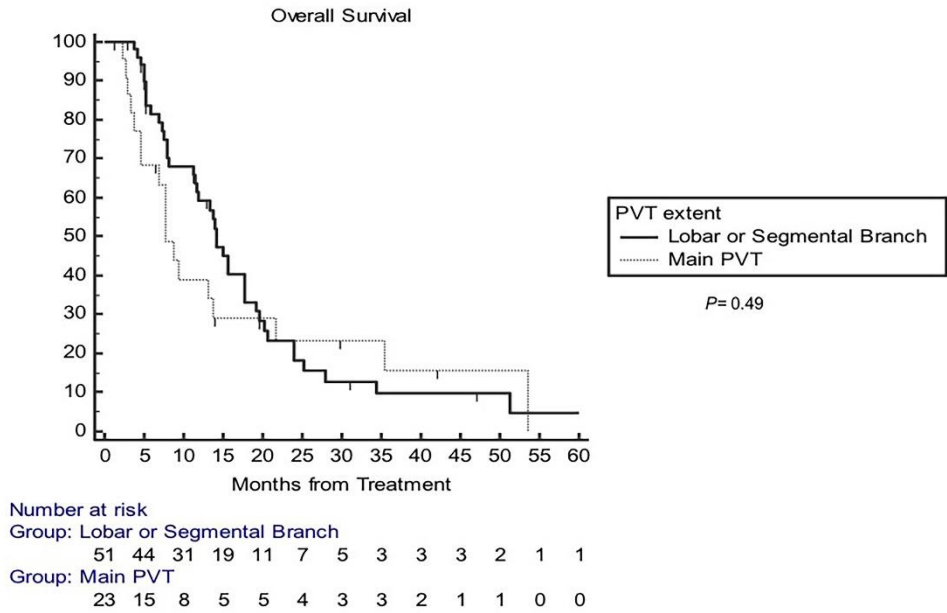

Supplemental Figure 1B: Overall Survival: CP A Main vs. Lobar/Segmental

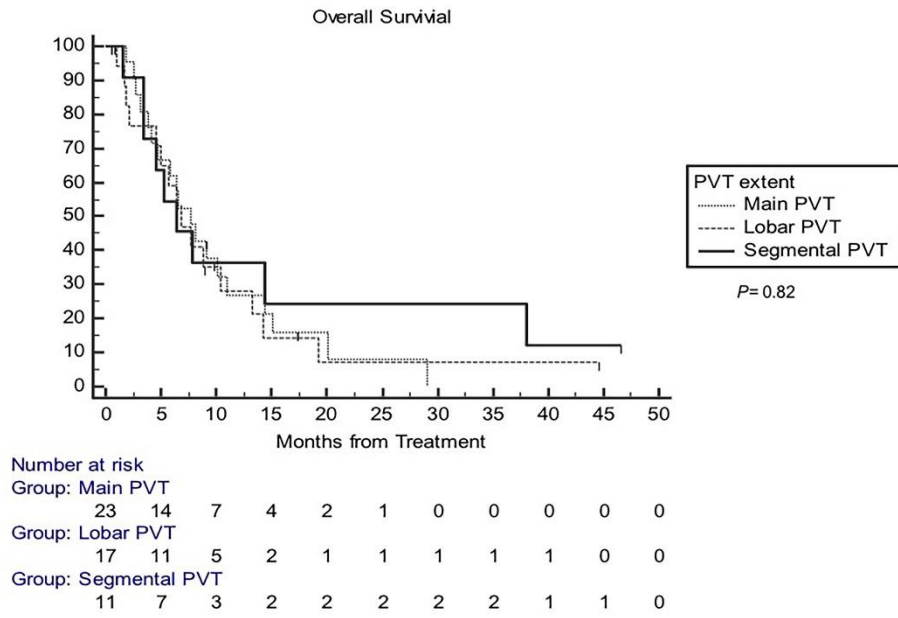

Supplemental Figure 2A: Overall Survival: CP B7 Main vs. Lobar vs. Segmental

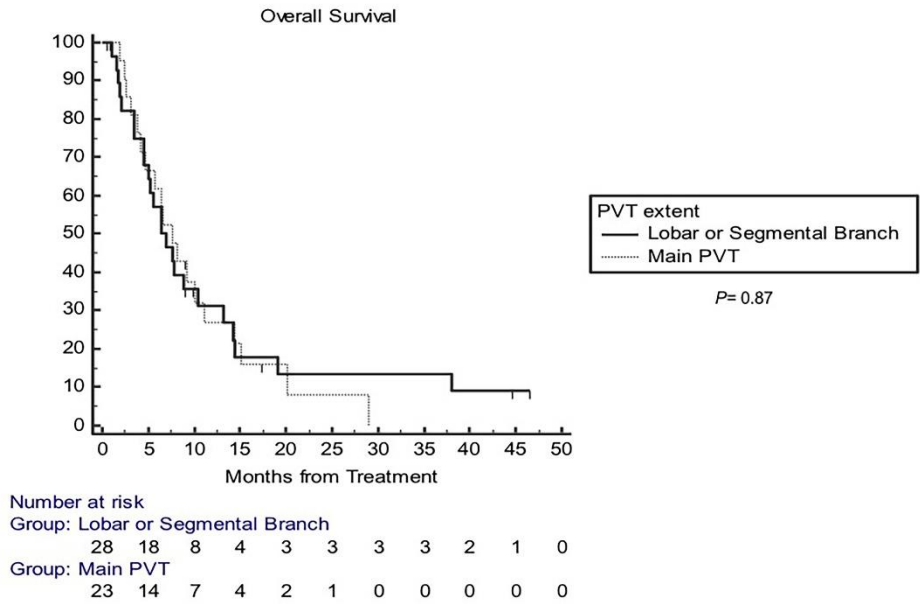

Supplemental Figure 2B: Overall Survival: CP B7 Main vs. Lobar/Segmental

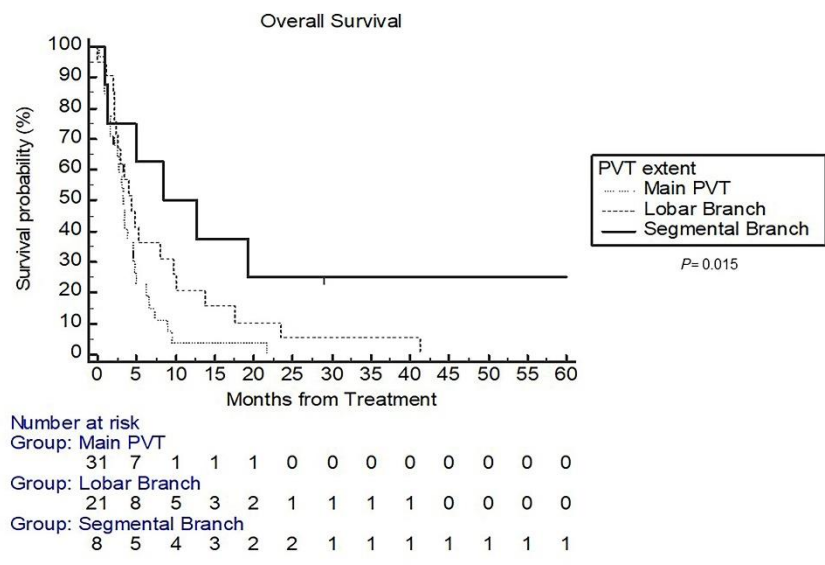

Supplemental Figure 3A: Overall Survival: CP  $\geq$ B8 Main vs. Lobar vs. Segmental

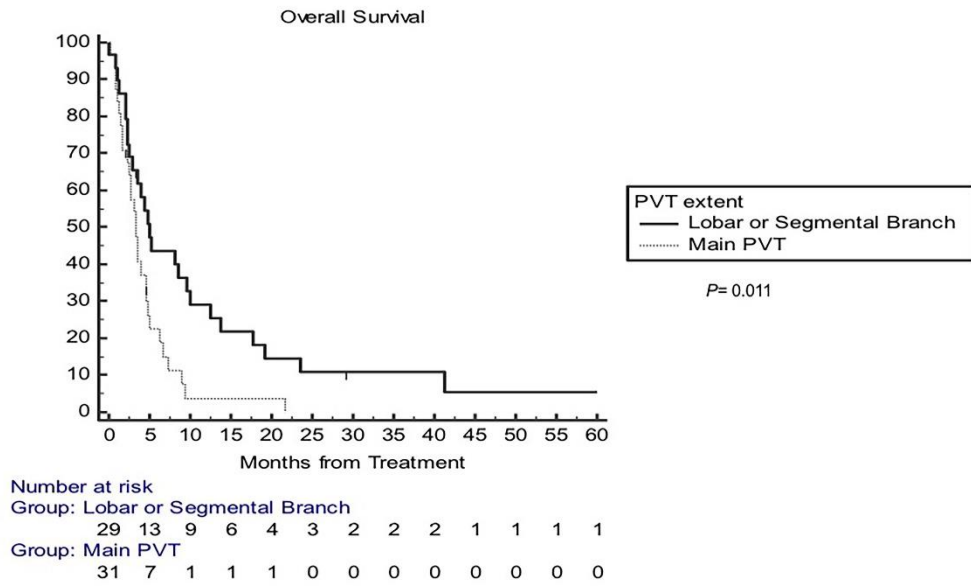

Supplemental Figure 3B: Overall Survival: CP  $\geq$ B8 Main vs. Lobar/Segmental
